# Supplementary material for: A 1024-sample serum analyzer chip for cancer diagnostics
Source: Royal Society of Chemistry journal article supplement (doi:10.1039/c3lc51153g), 2013-11-26
Supplement: c3lc51153g.xlsx [file c3lc51153g.xlsx]

## Sheet: (1)Cost
CHIP
Item description	Part Number	Supplier	Amount bought (mg)	Cost (USD)	concentration used in chip (mg/mL)	length used (mm), 0.25 mm radius tubing	total volume used in chip (mL)	total protein used in chip (mg)	total protein used per assay unit (pg)	cost (USD)	%percentage of total costs	Comments
biotin-bsa	29130	Thermo Fisher	25	149.1	2	26	0.0051051	0.0102102	9705.51	0.0608936	61.8791
neutravidin	31000	Thermo Fisher	10	156.45	0.5	13	0.00255255	0.00127628	1213.19	0.0199673	20.2905
biotin anti-IL-6 capture antibody	13-7068-81	e-bioscience	0.05	99	0.002	13	0.00255255	5.1051e-06	4.85276	0.0101081	10.2717
PE anti-IL-6 detection antibody	12-7069-81	e-bioscience	0.05	139	0.0001	5	0.00098175	9.8175e-08	0.0933222	0.000272927	0.277344
IL-6 protein standard	39-8069-65	e-bioscience	2e-05	20	0.001	spotted sample	6.75e-06	6.75e-09	0.00641635	0.00675	6.85924	standard spotted 5 times
ELISA buffer (5x), mL	00-4202-56	e-bioscience	100	65		not in chip	5.4e-05			0.000415385	0.422107	only needed to prepare calibration curve, 8 dilutions
								Total cost per chip		0.0984074
								Total cost per assay		9.35431e-05
ELISA
Item description	Part Number	Supplier	Cost (USD)
Human IL-6 ELISA (128 tests)	BMS213INST	e-bioscience	489		Cost per assay	3.82031
Assay Protocol
Chip	Volume used (uL)		ELISA			Volume used (uL)
1052 spotted samples, 1.35 nL	1.42		96 well plate samples, 100 uL each one			9600
Biotin BSA	2.55		Washing 4x			38400
Washing	0.85		Biotin Detection Antibody			9600
Neutravidin	2.55		Washing 4x			38400
Washing	0.85		Streptavidin			9600
Biotin BSA	2.55		Washing 4x			38400
Washing	0.85		TMB Substrate			9600
1st Capture Antibody	2.55		Stop solution			4800
Washing	0.85
2nd Capture Antibody	2.55
Washing	0.85
3rd Capture Antibody	2.55
Washing	0.85
4th Capture Antibody	2.55
Washing	3.4
Cocktail Detection Antibody	0.85
Washing	2.55
Total vol. for1052 assays	31.17			Total vol. for 96 assays		148800
1 assay unit measuring 4 biomarkers
Volume per assay	0.0296293			Volume per assay		1550

## Sheet: (2)Time
Assay Protocol
Chip	Time (hrs)		ELISA			Time (hrs)
Spotting	5		Preparation of reagents and samples			1
Alignment of chip	0.1		Incubation			2.5
Set-up chip	0.2		Washing 4x			0.16
Biotin BSA	0.6		Biotin Detection Antibody			1
Washing	0.16		Washing 4x			0.16
Neutravidin	0.6		Streptavidin			0.75
Washing	0.16		Washing 4x			0.16
Biotin BSA	0.6		TMB Substrate			0.5
Washing	0.16		Stop solution			0.16
1st Capture Antibody	0.6		Scanning			0.1
Washing	0.33
2nd Capture Antibody	0.6
Washing	0.33
3rd Capture Antibody	0.6
Washing	0.33
4th Capture Antibody	0.6
Washing	0.33
Incubation	2.5
Washing	0.5
Flow Cocktail Detection Antibody	0.16
Washing	0.5
Scanning	0.1
Total time for 4208 assays per chip	15.06	hrs	Total time for 96 assays in one ELISA	Total time for 96 assays		6.49	hrs
Time per assay	0.0035789	hrs		Time per assay		0.0676042	hrs
	0.214734	min				4.05625	min
	12.884	secs				243.375	secs

## Sheet: (3)Volume
Assay Protocol
Chip	Volume used (uL)		ELISA			Volume used (uL)
1052 spotted samples, 1.35 nL	1.42		96 well plate samples, 100 uL each one			9600
Biotin BSA	2.55		Washing 4x			38400
Washing	0.85		Biotin Detection Antibody			9600
Neutravidin	2.55		Washing 4x			38400
Washing	0.85		Streptavidin			9600
Biotin BSA	2.55		Washing 4x			38400
Washing	0.85		TMB Substrate			9600
1st Capture Antibody	2.55		Stop solution			4800
Washing	0.85
2nd Capture Antibody	2.55
Washing	0.85
3rd Capture Antibody	2.55
Washing	0.85
4th Capture Antibody	2.55
Washing	3.4
Cocktail Detection Antibody	0.85
Washing	2.55
Total vol. for1052 assays	31.17			Total vol. for 96 assays		148800
Volume per assay	0.0296293			Volume per assay		1550
